# Supplementary material for: Associations between prior healthcare use, time to diagnosis, and clinical outcomes in inflammatory bowel disease: a nationally representative population-based cohort study
Source: PubMed Central journal article supplement — BMJ Open Gastroenterol. 2024 May 27;11(1):e001371. doi: 10.1136/bmjgast-2024-001371 (PMC11131120; doi:10.1136/bmjgast-2024-001371), 2024-05-27
Supplement: bmjgast-2024-001371supp001.pdf [file bmjgast-2024-001371supp001.pdf]

## SUPPLEMENTARY MATERIAL

### Appendix 1 -Read codes

#### List of CPRD med-codes used in the definition of gastrointestinal symptoms

##### Diarrhoea

| Description                             | Medcode |
|-----------------------------------------|---------|
| Diarrhoea symptoms                      | 5134    |
| Diarrhoea                               | 192     |
| Diarrhoea                               | 4343    |
| Loose stools                            | 1695    |
| Chronic diarrhoea                       | 6685    |
| Diarrhoea of presumed infectious origin | 5090    |
| Diarrhoea symptom NOS                   | 14695   |
| Noninfective diarrhoea                  | 6016    |
| Functional diarrhoea                    | 5036    |
| Increased frequency of defaecation      | 18682   |
| [D] Stools loose                        | 14881   |
| Irritable bowel syndrome with diarrhoea | 29835   |
| Infectious diarrhoea                    | 4542    |
| Gastroenteritis                         | 139     |
| Diarrhoea & vomiting, symptom           | 2182    |
| Diarrhoea and vomiting                  | 7644    |
| Viral gastroenteritis                   | 3107    |
| Diarrhoea & vomiting -? Infect          | 14665   |
| [D]Change in bowel habit                | [16665  |
| Travellers' diarrhoea                   | 11155   |
| Viral diarrhoea                         | 15289   |
| Infectious gastroenteritis              | 10294   |

##### Abdominal or perianal pain

| Description             | Medcode |
|-------------------------|---------|
| Abdominal pain          | 177     |
| [D]Abdominal pain       | 1763    |
| Abdominal pain type     | 1976    |
| Abdominal discomfort    | 2383    |
| Anal pain               | 3049    |
| Right iliac fossa pain  | 1181    |
| [D]Abdominal colic 2056 | 2056    |

|                                        |        |
|----------------------------------------|--------|
| Left iliac fossa pain 2982             | 2982   |
| Colicky abdominal pain                 | 7812   |
| Rectal pain                            | 2767   |
| [D]Abdominal cramps                    | 716    |
| O/E - abdomen tender                   | 5782   |
| [D]Abdominal pain NOS                  | 3338   |
| Site of abdominal pain                 | 5960   |
| Lower abdominal pain                   | 22608  |
| Central abdominal pain                 | 4617   |
| Flank pain                             | 7490   |
| [D]Nonspecific abdominal pain          | 19283  |
| [D]Functional abdominal pain syndrome  | 103540 |
| Iliac fossa pain                       | 421    |
| [D]Acute abdomen                       | 948    |
| O/E - abdo. pain on palpation          | 15180  |
| Anorectal pain                         | 2866   |
| Generalised abdominal pain             | 24661  |
| O/E -abd.pain on palpation NOS         | 14916  |
| O/E - abd. pain - L.ilic               | 21583  |
| Non-colicky abdominal pain             | 5691   |
| Abdominal pain in pregnancy            | 3191   |
| [D]Pain in left iliac fossa            | 16868  |
| [D]Pain in right iliac fossa           | 16806  |
| O/E - abd. pain - R.ilic               | 11647  |
| C/O pelvic pain                        | 2781   |
| Suprapubic pain                        | 7300   |
| Perianal irritation                    | 9837   |
| [D]Colic NOS                           | 1239   |
| Perianal itch                          | 5830   |
| [D]Epigastric pain                     | 542    |
| Perineal irritation                    | 7090   |
| [D] Perineal pain                      | 7248   |
| [D]Pelvic and perineal pain            | 9920   |
| [D]Recurrent acute abdominal pain      | 2234   |
| Upper abdominal pain                   | 3978   |
| Right upper quadrant pain              | 9695   |
| [D]Right upper quadrant pain           | 7726   |
| O/E - abd. pain – epigastrium          | 19223  |
| [D]Upper abdominal pain                | 8436   |
| Left flank pain                        | 701    |
| Epigastric pain                        | 290    |
| [D]Flatulence, eructation and gas pain | 14807  |
| Type of GIT pain                       | 14989  |
| Type of GIT pain – symptom             | 6395   |
| [D]Umbilical pain                      | 4771   |

**Rectal Bleeding**

| <b>Description</b> | <b>Medcode</b> |
|--------------------|----------------|
|--------------------|----------------|

|                                 |       |
|---------------------------------|-------|
| Rectal bleeding                 | 621   |
| Bleeding PR                     | 3872  |
| Painless rectal bleeding        | 11698 |
| Painful rectal bleeding         | 11718 |
| Blood in stool                  | 2873  |
| Blood in faeces                 | 5462  |
| Blood in faeces symptom         | 6151  |
| Gastrointestinal haemorrhage    | 3097  |
| GIB – Gastrointestinal bleeding | 1642  |
| Haemorrhoids                    | 195   |
| Piles - haemorrhoids            | 3833  |
| Haemorrhoids NOS                | 2096  |
| Bleeding haemorrhoids NOS       | 2832  |
| PRB – Rectal bleeding           | 6554  |

### Diarrhoea

| Description                                                                        | ICD-10 Code |
|------------------------------------------------------------------------------------|-------------|
| Functional diarrhoea                                                               | K59.1       |
| Protozoal intestinal disease, unspecified                                          | A07.9       |
| Flagellate diarrhoea                                                               |             |
| Protozoal:                                                                         |             |
| colitis                                                                            |             |
| diarrhoea                                                                          |             |
| dysentery                                                                          |             |
| Viral and other specified intestinal infections                                    | A08         |
| Excl.:                                                                             |             |
| influenza with involvement of gastrointestinal tract (J09, J10.8, J11.8)           |             |
| Rotaviral enteritis                                                                | A08.0       |
| Acute gastroenteropathy due to Norwalk agent                                       | A08.1       |
| Small round structured virus enteritis                                             |             |
| Adenoviral enteritis                                                               | A08.2       |
| Other viral enteritis                                                              | A08.3       |
| Viral intestinal infection, unspecified                                            | A08.4       |
| Viral:                                                                             |             |
| enteritis NOS                                                                      |             |
| gastroenteritis NOS                                                                |             |
| gastroenteropathy NOS                                                              |             |
| Other specified intestinal infections                                              | A08.5       |
| Other gastroenteritis and colitis of infectious and unspecified origin             | A09         |
| Excl.:                                                                             |             |
| due to bacterial, protozoal, viral and other specified infectious agents (A00-A08) |             |
| noninfective (see noninfectious) diarrhoea (K52.9)                                 |             |
| noninfective (see noninfectious) diarrhoea                                         |             |
| neonatal (P78.3)                                                                   |             |

|                                                                                       |       |
|---------------------------------------------------------------------------------------|-------|
| Other and unspecified gastroenteritis and colitis of infectious origin                | A09.0 |
| Catarrh, enteric or intestinal                                                        |       |
| Diarrhoea:                                                                            |       |
| acute bloody                                                                          |       |
| acute haemorrhagic                                                                    |       |
| acute watery                                                                          |       |
| dysenteric                                                                            |       |
| epidemic                                                                              |       |
| Infectious or septic                                                                  |       |
| colitis                                                                               |       |
| enteritis                                                                             |       |
| gastroenteritis                                                                       |       |
| NOS                                                                                   |       |
| haemorrhagic                                                                          |       |
| Infectious diarrhoea NOS                                                              |       |
| Gastroenteritis and colitis of unspecified origin                                     | A09.9 |
| Chronic intestinal amoebiasis                                                         | A06.1 |
| Amoebic nondysenteric colitis                                                         | A06.2 |
| Amoeboma of intestine                                                                 | A06.3 |
| Amoeboma NOS                                                                          |       |
| Noninfective gastroenteritis and colitis, unspecified                                 | K52.9 |
| Diarrhoea                                                                             |       |
| Enteritis                                                                             |       |
| Ileitis                                                                               |       |
| Jejunitis                                                                             |       |
| Sigmoiditis                                                                           |       |
| specified as noninfectious                                                            |       |
| Excl.:                                                                                |       |
| colitis, diarrhoea, enteritis, gastroenteritis:                                       |       |
| infectious (A09.0)                                                                    |       |
| unspecified origin (A09.9)                                                            |       |
| functional diarrhoea (K59.1)                                                          |       |
| neonatal diarrhoea (noninfective) (P78.3)                                             |       |
| psychogenic diarrhoea (F45.3)                                                         |       |
| Vascular disorder of intestine, unspecified                                           | K55.9 |
| Ischaemic:                                                                            |       |
| colitis                                                                               |       |
| enteritis                                                                             |       |
| enterocolitis                                                                         |       |
| NOS                                                                                   |       |
| Gastroenteritis and colitis due to radiation                                          | K52.0 |
| Toxic gastroenteritis and colitis                                                     | K52.1 |
| Use additional external cause code (Chapter XX), if desired, to identify toxic agent. |       |
| Allergic and dietetic gastroenteritis and colitis                                     | K52.2 |
| Food hypersensitivity gastroenteritis or colitis                                      |       |
| Noninfective gastroenteritis and colitis, unspecified                                 | K52.9 |
| Diarrhoea                                                                             |       |
| Enteritis                                                                             |       |

|                                                 |       |
|-------------------------------------------------|-------|
| Ileitis                                         |       |
| Jejunitis                                       |       |
| Sigmoiditis                                     |       |
| specified as noninfectious                      |       |
| Excl.:                                          |       |
| colitis, diarrhoea, enteritis, gastroenteritis: |       |
| infectious (A09.0)                              |       |
| unspecified origin (A09.9)                      |       |
| functional diarrhoea (K59.1)                    |       |
| neonatal diarrhoea (noninfective) (P78.3)       |       |
| psychogenic diarrhoea (F45.3)                   |       |
| psychogenic diarrhoea                           | F45.3 |
| Irritable bowel syndrome with diarrhoea         | K58.0 |

### Abdominal or perianal pain

| Description                                                             | ICD-10 Code |
|-------------------------------------------------------------------------|-------------|
| Acute abdomen                                                           | R10.0       |
| Severe abdominal pain (generalized)(localized)(with abdominal rigidity) |             |
| Pain localized to upper abdomen                                         | R10.1       |
| Epigastric pain                                                         |             |
| Pelvic and perineal pain                                                | R10.2       |
| Pain localized to other parts of lower abdomen                          | R10.3       |
| Other and unspecified abdominal pain                                    | R10.4       |
| Abdominal tenderness NOS                                                |             |
| Colic:                                                                  |             |
| NOS                                                                     |             |
| Infantile                                                               |             |
| Other specified disease of anus and rectum                              | K62.8       |
| Pain   rectum                                                           |             |

### Rectal bleeding

| Description                                    | ICD-10 Code |
|------------------------------------------------|-------------|
| Internal haemorrhoids with other complications | I84.1       |
| Internal haemorrhoids:                         |             |
| bleeding                                       |             |
| prolapsed                                      |             |
| strangulated                                   |             |
| ulcerated                                      |             |
| Internal haemorrhoids without complication     | I84.2       |
| Internal haemorrhoids NOS                      |             |

|                                                                   |       |
|-------------------------------------------------------------------|-------|
| External thrombosed haemorrhoids                                  | 184.3 |
| Perianal haematoma (nontraumatic)                                 |       |
| Perianal thrombosis                                               |       |
| External haemorrhoids with other complications                    | 184.4 |
| External haemorrhoids:                                            |       |
| bleeding                                                          |       |
| prolapsed                                                         |       |
| strangulated                                                      |       |
| ulcerated                                                         |       |
| External haemorrhoids without complication                        | 184.5 |
| External haemorrhoids NOS                                         |       |
| 184.6                                                             |       |
| Residual haemorrhoidal skin tags                                  |       |
| Skin tags of anus or rectum                                       |       |
| Unspecified thrombosed haemorrhoids                               | 184.7 |
| Thrombosed haemorrhoids, unspecified whether internal or external |       |
| Unspecified haemorrhoids with other complications                 | 184.8 |
| Haemorrhoids, unspecified whether internal or external:           |       |
| bleeding                                                          |       |
| prolapsed                                                         |       |
| strangulated                                                      |       |
| ulcerated                                                         |       |
| Unspecified haemorrhoids without complication                     | 184.9 |
| Haemorrhoids NOS                                                  |       |
| Other faecal abnormalities                                        | R19.5 |
| Abnormal stool colour                                             |       |
| Bulky stools                                                      |       |
| Mucus in stools                                                   |       |
| Occult blood in stools                                            |       |
| Excl.:                                                            |       |
| melaena (K92.1)                                                   |       |
| melaena                                                           |       |
| Haemorrhage of anus and rectum                                    | K62.5 |
| Gastrointestinal haemorrhage, unspecified                         | K92.2 |
| Haemorrhage:                                                      |       |
| gastric NOS                                                       |       |
| intestinal NOS                                                    |       |
| Excl.:                                                            |       |
| acute haemorrhagic gastritis (K29.0)                              |       |
| haemorrhage of anus and rectum (K62.5)                            |       |
| with peptic ulcer (K25-K28)                                       |       |

## List of CPRD prod-codes for corticosteroid prescriptions

| Prodcode | Product Name                                                                   |
|----------|--------------------------------------------------------------------------------|
| 5913     | Deltacortril 2.5mg gastro-resistant tablets (Alliance Pharmaceuticals Ltd)     |
| 5490     | Deltacortril 5mg gastro-resistant tablets (Alliance Pharmaceuticals Ltd)       |
| 27962    | Deltastab 1mg Tablet (Waymade Healthcare Plc)                                  |
| 28859    | Deltastab 5mg Tablet (Waymade Healthcare Plc)                                  |
| 59283    | Dilacort 2.5mg gastro-resistant tablets (Auden McKenzie (Pharma Division) Ltd) |
| 59229    | Dilacort 5mg gastro-resistant tablets (Auden McKenzie (Pharma Division) Ltd)   |
| 25272    | Precortisyl 1mg Tablet (Hoechst Marion Roussel)                                |
| 23512    | Precortisyl 5mg Tablet (Hoechst Marion Roussel)                                |
| 20095    | Precortisyl forte 25mg Tablet (Aventis Pharma)                                 |
| 10934    | Predenema 20mg/100ml long tube (Forest Laboratories UK Ltd)                    |
| 58234    | Prednisolone 10mg/5ml oral solution                                            |
| 34914    | Prednisolone 1mg Tablet (Celltech Pharma Europe Ltd)                           |
| 34631    | Prednisolone 1mg Tablet (Co-Pharma Ltd)                                        |
| 578      | Prednisolone 1mg tablets                                                       |
| 34452    | Prednisolone 1mg tablets (A A H Pharmaceuticals Ltd)                           |
| 34404    | Prednisolone 1mg tablets (Actavis UK Ltd)                                      |
| 58384    | Prednisolone 1mg tablets (Almus Pharmaceuticals Ltd)                           |
| 34660    | Prednisolone 1mg tablets (Kent Pharmaceuticals Ltd)                            |
| 34748    | Prednisolone 1mg tablets (Teva UK Ltd)                                         |
| 56891    | Prednisolone 1mg tablets (Waymade Healthcare Plc)                              |
| 34978    | Prednisolone 1mg tablets (Wockhardt UK Ltd)                                    |
| 59338    | Prednisolone 1mg/5ml oral solution                                             |
| 28376    | Prednisolone 2.5mg Gastro-resistant tablet (Biorex Laboratories Ltd)           |
| 557      | Prednisolone 2.5mg gastro-resistant tablets                                    |
| 28375    | Prednisolone 2.5mg gastro-resistant tablets (A A H Pharmaceuticals Ltd)        |
| 34461    | Prednisolone 2.5mg gastro-resistant tablets (Actavis UK Ltd)                   |
| 2368     | Prednisolone 2.5mg tablet                                                      |
| 54434    | Prednisolone 2.5mg/5ml oral suspension                                         |
| 38407    | Prednisolone 20mg tablet                                                       |
| 820      | Prednisolone 20mg/100ml retention enema                                        |
| 53313    | Prednisolone 20mg/5ml oral suspension                                          |
| 2704     | Prednisolone 25mg tablets                                                      |
| 41745    | Prednisolone 25mg tablets (Zentiva)                                            |
| 54118    | Prednisolone 25mg/5ml oral suspension                                          |
| 42408    | Prednisolone 40mg/100ml enema                                                  |
| 34109    | Prednisolone 5 mg gastro-resistant tablet                                      |
| 9727     | Prednisolone 50mg tablets                                                      |
| 33691    | Prednisolone 5mg Gastro-resistant tablet (Biorex Laboratories Ltd)             |
| 45302    | Prednisolone 5mg Tablet (Biorex Laboratories Ltd)                              |
| 33988    | Prednisolone 5mg Tablet (Co-Pharma Ltd)                                        |
| 33990    | Prednisolone 5mg Tablet (IVAX Pharmaceuticals UK Ltd)                          |
| 44       | Prednisolone 5mg gastro-resistant tablets                                      |
| 31532    | Prednisolone 5mg gastro-resistant tablets (A A H Pharmaceuticals Ltd)          |
| 32803    | Prednisolone 5mg gastro-resistant tablets (Actavis UK Ltd)                     |
| 34393    | Prednisolone 5mg gastro-resistant tablets (Teva UK Ltd)                        |
| 59912    | Prednisolone 5mg gastro-resistant tablets (Waymade Healthcare Plc)             |
| 95       | Prednisolone 5mg tablets                                                       |

|       |                                                                           |
|-------|---------------------------------------------------------------------------|
| 21417 | Prednisolone 5mg tablets (A A H Pharmaceuticals Ltd)                      |
| 29333 | Prednisolone 5mg tablets (Actavis UK Ltd)                                 |
| 58000 | Prednisolone 5mg tablets (Almus Pharmaceuticals Ltd)                      |
| 34781 | Prednisolone 5mg tablets (Kent Pharmaceuticals Ltd)                       |
| 41515 | Prednisolone 5mg tablets (Teva UK Ltd)                                    |
| 61162 | Prednisolone 5mg tablets (Waymade Healthcare Plc)                         |
| 32835 | Prednisolone 5mg tablets (Wockhardt UK Ltd)                               |
| 55024 | Prednisolone 5mg/5ml oral solution                                        |
| 34221 | Prednisolone suppositories                                                |
| 16525 | Budenofalk 3mg gastro-resistant capsules (Dr. Falk Pharma UK Ltd)         |
| 56144 | Budenofalk 9mg gastro-resistant granules sachets (Dr. Falk Pharma UK Ltd) |
| 6095  | Budesonide 3mg gastro-resistant capsules                                  |
| 51997 | Budesonide 9mg gastro-resistant granules sachets                          |
| 1380  | Entocort CR 3mg capsules (AstraZeneca UK Ltd)                             |



## List of CPRD Read Codes for IBS diagnosis

| Read Code | Read Term                                                         |
|-----------|-------------------------------------------------------------------|
| Eu453     | [X]Psychogenic IBS                                                |
| J521.     | Irritable bowel syndrome                                          |
| J5210     | Irritable bowel syndrome with diarrhoea                           |
| J5211     | Irritable bowel syndrome characterised by constipation            |
| J5212     | Irritable bowel syndrome characterised by alternating bowel habit |

## Appendix 2-Flow diagram of patients stratified by primary care consultation frequency and hospitalisation prior to IBD diagnosis

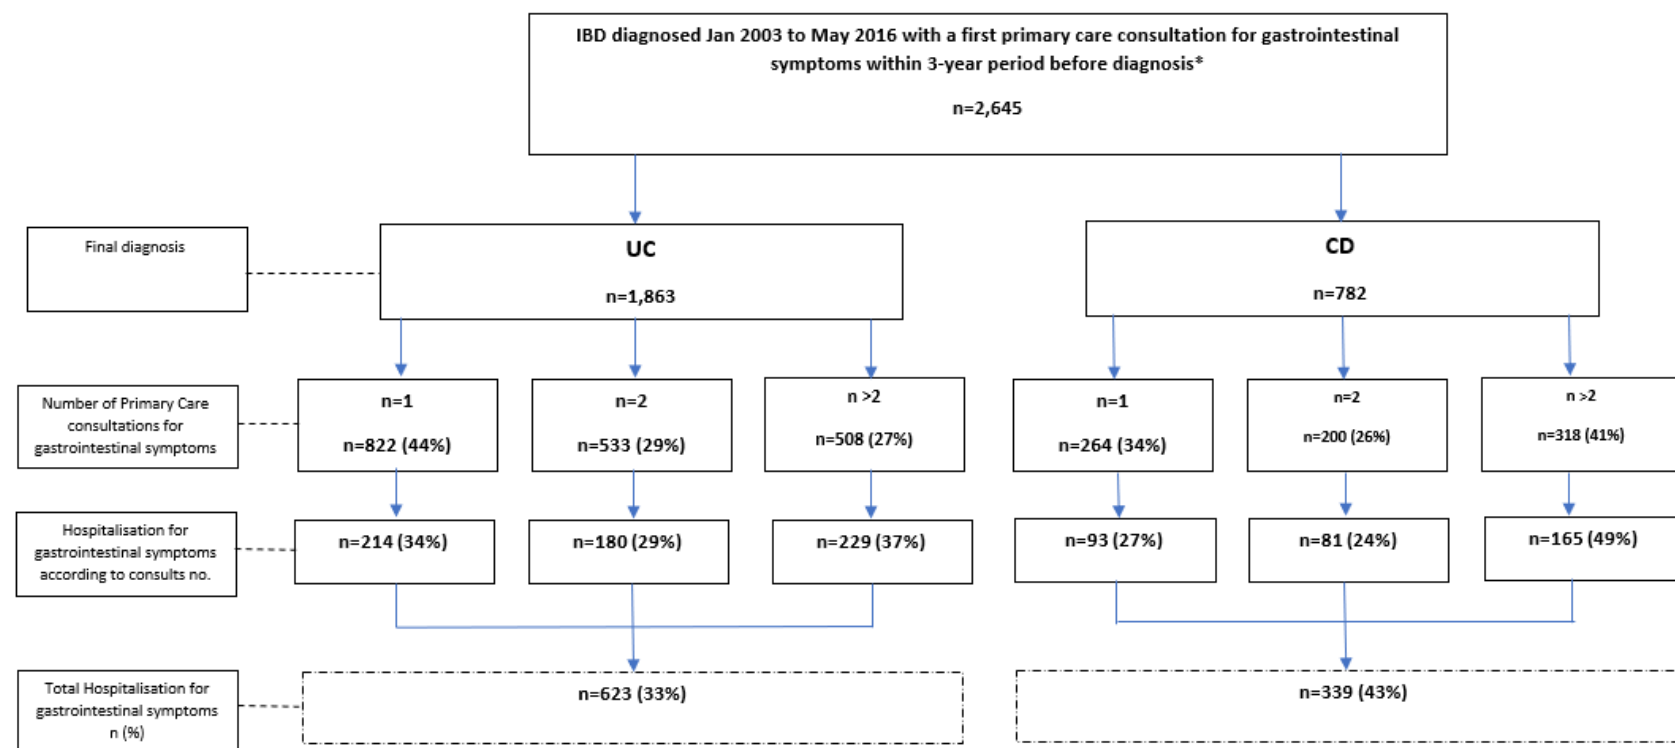

\* All individuals had at least four years of follow-up from registering with their general practice before IBD diagnosis, and the first of these years free of any record of gastrointestinal symptoms. Abbreviations CD: Crohn's Disease; UC: Ulcerative colitis

### Appendix 3: Association of time to diagnosis, consultation frequency and hospitalisation for gastrointestinal symptoms before diagnosis with clinical outcomes following diagnosis of (a) Crohn's disease (b) Ulcerative colitis

#### (a) Crohn's disease

|                                         | CS use                             |                                   | CS dependency          |                      | IM use                 |                                   | IBD Hospitalisation    |                                    | Intestinal surgery     |                                   | Perianal surgery                  |                                   |
|-----------------------------------------|------------------------------------|-----------------------------------|------------------------|----------------------|------------------------|-----------------------------------|------------------------|------------------------------------|------------------------|-----------------------------------|-----------------------------------|-----------------------------------|
|                                         | Unadjusted HR (95% CI)             | Adjusted HR (95% CI)              | Unadjusted HR (95% CI) | Adjusted HR (95% CI) | Unadjusted HR (95% CI) | Adjusted HR (95% CI)              | Unadjusted HR (95% CI) | Adjusted HR (95% CI)               | Unadjusted HR (95% CI) | Adjusted HR (95% CI)              | Unadjusted HR (95% CI)            | Adjusted HR (95% CI)              |
| <b>Consultation frequency</b>           |                                    |                                   |                        |                      |                        |                                   |                        |                                    |                        |                                   |                                   |                                   |
| <b>1</b>                                | -                                  | -                                 | -                      | -                    | -                      | -                                 | -                      | -                                  | -                      | -                                 | -                                 | -                                 |
| <b>2</b>                                | 0.90<br>(0.70-1.18)                | 0.90<br>(0.68-1.18)               | 1.11<br>(0.75-1.64)    | 1.11<br>(0.74-1.65)  | 1.09<br>(0.81-1.47)    | 1.05<br>(0.78-1.43)               | 1.78<br>(1.24-2.54)    | 1.35<br>(0.94-1.93)                | 1.49<br>(0.94-2.36)    | 1.58<br>(0.99-2.51)               | 1.13<br>(0.86-1.48)               | 1.08<br>(0.81-1.44)               |
| <b>≥ 3</b>                              | 1.18<br>(0.94-1.49)                | 1.21<br>(0.94-1.56)               | 1.23<br>(0.87-1.75)    | 1.23<br>(0.84-1.80)  | 1.14<br>(0.88-1.48)    | 1.11<br>(0.84-1.52)               | 1.76<br>(1.27-2.44)    | <b>1.80</b><br><b>(1.29-2.50)</b>  | 2.13<br>(1.44-3.16)    | <b>2.22</b><br><b>(1.45-3.39)</b> | 1.12<br>(0.88-1.43)               | 1.00<br>(0.79-1.36)               |
| <b>Time to diagnosis</b>                | 0.92<br>(0.81-1.03)                | 0.89<br>(0.78-1.01)               | 0.68<br>(0.79-1.12)    | 0.89<br>(0.73-1.07)  | 0.94<br>(0.74-1.22)    | 0.92<br>(0.80-1.06)               | 0.98<br>(0.84-1.15)    | <b>1.03</b><br><b>(1.01-1.68)</b>  | 0.99<br>(0.82-1.19)    | 0.87<br>(0.71-1.06)               | 1.01<br>(0.87-1.14)               | 1.00<br>(0.88-1.15)               |
| <b>Pre-diagnosis hospital admission</b> | 1.03<br>(0.82-1.30)                | 0.96<br>(0.76-1.21)               | 0.94<br>(0.50-0.93)    | 1.05<br>(0.78-1.42)  | 0.95<br>(0.82-1.07)    | 0.78<br>(0.60-1.01)               | 1.42<br>(1.09-1.84)    | <b>1.30</b><br><b>(1.01-1.68)</b>  | 1.77<br>(1.18-2.68)    | <b>1.71</b><br><b>(1.13-2.58)</b> | 1.37<br>(1.11-1.69)               | 1.19<br>(0.96-1.48)               |
| <b>Sex</b>                              |                                    |                                   |                        |                      |                        |                                   |                        |                                    |                        |                                   |                                   |                                   |
| <b>Female</b>                           | -                                  | -                                 | -                      | -                    | -                      | -                                 | -                      | -                                  | -                      | -                                 | -                                 | -                                 |
| <b>Male</b>                             | 1.11<br>(0.91-1.35)                | 1.13<br>(0.55-0.86)               | 0.76<br>(0.58-1.04)    | 0.85<br>(0.62-1.15)  | 1.16<br>(0.93-1.45)    | 1.04<br>(0.83-1.32)               | 1.14<br>(0.87-1.48)    | 1.12<br>(0.87-1.44)                | 1.11<br>(0.82-1.53)    | 1.20<br>(0.86-1.66)               | 1.16<br>(0.94-1.43)               | 1.05<br>(0.84-1.30)               |
| <b>Age at IBD diagnosis</b>             |                                    |                                   |                        |                      |                        |                                   |                        |                                    |                        |                                   |                                   |                                   |
| <b>&gt; 40 years</b>                    | -                                  | -                                 | -                      | -                    | -                      | -                                 | -                      | -                                  | -                      | -                                 | -                                 | -                                 |
| <b>&lt; 17 years</b>                    | 1.50<br>(1.21-1.86)                | <b>1.45</b><br>(1.00-2.09)        | 1.06<br>(0.63-1.79)    | 1.20<br>(0.68-2.12)  | 3.67<br>(2.63-5.10)    | <b>3.60</b><br><b>(2.47-5.24)</b> | 2.78<br>(1.86-4.15)    | <b>2.31</b><br><b>(1.51-3.56)</b>  | 0.86<br>(0.47-1.58)    | 0.71<br>(0.37-1.36)               | 1.55<br>(1.11-1.46)               | <b>1.72</b><br><b>(1.18-2.51)</b> |
| <b>17 - 40 years</b>                    | <b>1.50</b><br><b>(1.21- 1.87)</b> | <b>1.46</b><br><b>(1.16-1.83)</b> | 1.36<br>(0.98-1.86)    | 1.26<br>(0.90-1.76)  | 1.79<br>(1.37- 2.33)   | <b>1.89</b><br><b>(1.43-2.49)</b> | 1.77<br>(1.34-2.33)    | <b>1.52</b><br><b>(1.14- 2.03)</b> | 1.41<br>(1.00-1.98)    | 1.18<br>(0.83-1.68)               | 1.17<br>(0.93-1.46)               | 1.27<br>(0.99-1.62)               |
| <b>Era of IBD diagnosis</b>             |                                    |                                   |                        |                      |                        |                                   |                        |                                    |                        |                                   |                                   |                                   |
| <b>Era 1</b>                            | -                                  | -                                 | -                      | -                    | -                      | -                                 | -                      | -                                  | -                      | -                                 | -                                 | -                                 |
| <b>Era 2</b>                            | 1.06<br>(0.81-1.39)                | 1.07<br>(0.82-1.42)               | 0.89<br>(0.60-1.31)    | 0.88<br>(0.59-1.29)  | 1.47<br>(1.03-2.07)    | 1.50<br>(0.66-1.41)               | 1.28<br>(0.88-1.85)    | 1.18<br>(0.83-1.69)                | 1.25<br>(0.81-1.94)    | 1.34<br>(0.86-2.08)               | 1.35<br>(0.96-1.88)               | 1.37<br>(0.98-1.92)               |
| <b>Era 3</b>                            | 0.94<br>(0.71-1.26)                | 0.90<br>(0.91-0.68)               | 0.73<br>(0.48-1.11)    | 0.72<br>(0.47-1.11)  | 1.97<br>(1.40-2.79)    | <b>2.02</b><br><b>(1.41-1.26)</b> | 1.19<br>(0.80-1.75)    | 1.15<br>(0.80-1.65)                | 1.33<br>(0.84-2.08)    | 1.29<br>(0.81-2.06)               | <b>2.25</b><br><b>(1.62-3.11)</b> | <b>2.21</b><br><b>(1.58-3.09)</b> |
| <b>Era 4</b>                            | 1.34<br>(1.01-1.77)                | 1.32<br>(0.99-1.77)               | 0.77<br>(0.50-1.17)    | 0.76<br>(0.49-1.18)  | 3.31<br>(2.34-4.65)    | <b>3.32</b><br><b>(2.34-4.74)</b> | 1.88<br>(1.28-2.76)    | <b>2.00</b><br><b>(1.35-2.98)</b>  | 1.29<br>(0.80-2.07)    | 1.25<br>(0.76-2.04)               | <b>4.78</b><br><b>(3.48-6.55)</b> | <b>4.54</b><br><b>(3.28-6.28)</b> |
| <b>Smoking status*</b>                  |                                    |                                   |                        |                      |                        |                                   |                        |                                    |                        |                                   |                                   |                                   |

|                    |                     |                     |                     |                     |                     |                     |                     |                     |                     |                     |                     |                     |
|--------------------|---------------------|---------------------|---------------------|---------------------|---------------------|---------------------|---------------------|---------------------|---------------------|---------------------|---------------------|---------------------|
| Never              | -                   | -                   | -                   | -                   | -                   | -                   | -                   | -                   | -                   | -                   | -                   | -                   |
| Ex-smoker          | 0.95<br>(0.72-1.25) | 0.85<br>(0.61-1.18) | 1.22<br>(0.83-1.83) | 0.90<br>(0.55-1.48) | 0.83<br>(0.60-1.14) | 0.91<br>(0.65-1.26) | 0.90<br>(0.63-1.31) | 0.60<br>(0.38-0.93) | 0.97<br>(0.64-1.47) | 0.96<br>(0.63-1.46) | 0.82<br>(0.60-1.12) | 0.94<br>(0.67-1.31) |
| Current            | 0.78<br>(0.61-1.01) | 0.99<br>(0.75-1.31) | 0.80<br>(0.50-1.31) | 1.22<br>(0.82-1.83) | 0.93<br>(0.70-1.23) | 0.88<br>(0.65-1.19) | 0.91<br>(0.66-1.24) | 1.05<br>(0.75-1.48) | 0.67<br>(0.45-0.99) | 0.76<br>(0.50-1.16) | 0.80<br>(0.60-1.06) | 0.90<br>(0.67-1.20) |
| Social deprivation |                     |                     |                     |                     |                     |                     |                     |                     |                     |                     |                     |                     |
| IMD 1-3            | -                   | -                   | -                   | -                   | -                   | -                   | -                   | -                   | -                   | -                   | -                   | -                   |
| IMD 4-5            | 1.20<br>(0.99-1.48) | 1.12<br>(0.91-1.39) | 1.23<br>(0.91-1.66) | 1.14<br>(0.83-1.56) | 1.16<br>(0.92-1.47) | 0.97<br>(0.76-1.24) | 1.16<br>(0.88-1.52) | 1.12<br>(0.86-1.46) | 1.21<br>(0.87-1.67) | 1.11<br>(0.80-1.55) | 1.02<br>(0.82-1.27) | 0.87<br>(0.69-1.08) |

### (b) Ulcerative Colitis

|                                  | CS use                             |                                   | CS dependency          |                                   | IM use                 |                                   | IBD-Hospitalisation    |                                    | Colectomy              |                                   |
|----------------------------------|------------------------------------|-----------------------------------|------------------------|-----------------------------------|------------------------|-----------------------------------|------------------------|------------------------------------|------------------------|-----------------------------------|
|                                  | Unadjusted HR (95% CI)             | Adjusted HR (95% CI)              | Unadjusted HR (95% CI) | Adjusted HR (95% CI)              | Unadjusted HR (95% CI) | Adjusted HR (95% CI)              | Unadjusted HR (95% CI) | Adjusted HR (95% CI)               | Unadjusted HR (95% CI) | Adjusted HR (95% CI)              |
| Consultation frequency           |                                    |                                   |                        |                                   |                        |                                   |                        |                                    |                        |                                   |
| 1                                | -                                  | -                                 | -                      | -                                 | -                      | -                                 | -                      | -                                  | -                      | -                                 |
| 2                                | 1.22<br>(1.01-1.48)                | <b>1.26</b><br><b>(1.04-1.60)</b> | 1.27<br>(0.94-1.73)    | 1.28<br>(0.94-1.75)               | 1.15<br>(0.86-1.54)    | 1.12<br>(0.83-1.51)               | 1.33<br>(0.97-1.81)    | 1.24<br>(0.93-1.66)                | 0.86<br>(0.51-1.44)    | 0.93<br>(0.55-1.57)               |
| ≥ 3                              | 1.53<br>(1.27-1.84)                | <b>1.60</b><br><b>(1.31-1.96)</b> | 1.72<br>(1.29-2.31)    | <b>1.76</b><br><b>(1.28-2.41)</b> | 1.71<br>(1.30-2.24)    | <b>1.68</b><br><b>(1.24-2.26)</b> | 1.66<br>(1.23-2.44)    | <b>1.43</b><br><b>(1.05-1.95)</b>  | 1.57<br>(0.99-2.46)    | <b>2.01</b><br><b>(1.22-3.27)</b> |
| Time to diagnosis                | 0.96<br>(0.87-1.05)                | <b>0.87</b><br><b>(0.79-0.97)</b> | 1.04<br>(0.90-1.20)    | 0.95<br>(0.81-1.11)               | 0.98<br>(0.86-1.13)    | 0.88<br>(0.76-1.03)               | 0.91<br>(0.78-1.06)    | <b>0.83</b><br><b>(0.70-0.98)</b>  | 0.71<br>(0.54-0.95)    | <b>0.59</b><br><b>(0.43-0.80)</b> |
| Pre-diagnosis hospital admission | 1.25<br>(1.06-1.46)                | 1.18<br>(0.99-1.39)               | 1.10<br>(0.85-1.42)    | 1.04<br>(0.80-1.36)               | 1.51<br>(1.19-1.91)    | <b>1.42</b><br><b>(1.11-1.81)</b> | 1.58<br>(1.22-2.03)    | <b>1.36</b><br><b>(1.06-1.95)</b>  | 1.41<br>(0.94-2.11)    | <b>1.54</b><br><b>(1.01-2.34)</b> |
| Sex                              |                                    |                                   |                        |                                   |                        |                                   |                        |                                    |                        |                                   |
| Female                           | -                                  | -                                 | -                      | -                                 | -                      | -                                 | -                      | -                                  | -                      | -                                 |
| Male                             | 1.01<br>(0.86-1.18)                | 1.00<br>(0.85-1.17)               | 1.31<br>(1.02-1.69)    | <b>1.37</b><br><b>(1.06-1.76)</b> | 1.17<br>(0.92-1.47)    | 1.16<br>(0.92-1.48)               | 0.97<br>(0.75-1.25)    | 1.01<br>(0.79-1.29)                | 1.45<br>(0.96-2.19)    | 1.42<br>(0.93-2.16)               |
| Age at IBD diagnosis             |                                    |                                   |                        |                                   |                        |                                   |                        |                                    |                        |                                   |
| >40                              | -                                  | -                                 | -                      | -                                 | -                      | -                                 | -                      | -                                  | -                      | -                                 |
| <17                              | 1.88<br>(1.302-72)                 | <b>1.82</b><br><b>(1.24-2.69)</b> | 2.41<br>(1.44-4.04)    | <b>2.38</b><br><b>(1.37-4.12)</b> | 3.40<br>(2.17-5.32)    | <b>3.35</b><br><b>(2.07-5.43)</b> | 3.54<br>(2.19-5.71)    | <b>3.40</b><br><b>(1.47-1.89)</b>  | 2.77<br>(1.25-6.11)    | <b>2.54</b><br><b>(1.09-5.95)</b> |
| 17 – 39                          | <b>1.39</b><br><b>(1.18- 1.63)</b> | <b>1.34</b><br><b>(1.14-1.60)</b> | 1.55<br>(1.20-2.00)    | <b>1.52</b><br><b>(1.17-1.98)</b> | 1.87<br>(0.46- 2.38)   | <b>1.83</b><br><b>(1.42-2.34)</b> | 1.56<br>(1.22-2.00)    | <b>1.47</b><br><b>(1.14- 1.89)</b> | 1.68<br>(1.11- 2.55)   | <b>1.81</b><br><b>(1.17-2.79)</b> |
| Era of IBD diagnosis             |                                    |                                   |                        |                                   |                        |                                   |                        |                                    |                        |                                   |

|                           |                     |                                   |                     |                     |                     |                                   |                      |                     |                     |                     |
|---------------------------|---------------------|-----------------------------------|---------------------|---------------------|---------------------|-----------------------------------|----------------------|---------------------|---------------------|---------------------|
| <b>Era 1</b>              | -                   | -                                 | -                   | -                   | -                   | -                                 | -                    | -                   | -                   | -                   |
| <b>Era 2</b>              | 1.16<br>(0.93-1.45) | 1.14<br>(0.92-1.43)               | 1.04<br>(0.76-1.43) | 1.05<br>(0.76-1.44) | 1.15<br>(0.81-1.62) | 1.11<br>(0.78-1.57)               | 0.91<br>(0.64-1.30)  | 0.82<br>(0.58-1.13) | 0.73<br>(0.43-1.22) | 0.65<br>(0.38-1.09) |
| <b>Era 3</b>              | 1.42<br>(1.14-1.78) | <b>1.35</b><br><b>(1.07-1.70)</b> | 0.89<br>(0.63-1.26) | 0.83<br>(0.58-1.20) | 1.71<br>(1.23-2.39) | <b>1.53</b><br><b>(1.08-2.15)</b> | 1.05<br>(0.73-1.50)  | 0.91<br>(0.66-1.29) | 0.76<br>(0.43-1.31) | 0.62<br>(0.35-1.11) |
| <b>Era 4</b>              | 1.49<br>(1.17-1.89) | <b>1.44</b><br><b>(1.14-1.83)</b> | 0.80<br>(0.55-1.17) | 0.76<br>(0.52-1.12) | 2.06<br>(1.45-2.93) | <b>1.95</b><br><b>(1.36-2.80)</b> | 1.56<br>(1.09-2.23)  | 1.15<br>(0.79-1.58) | 0.93<br>(0.52-1.67) | 0.85<br>(0.46-1.54) |
| <b>Smoking status*</b>    |                     |                                   |                     |                     |                     |                                   |                      |                     |                     |                     |
| <b>Never</b>              | -                   | -                                 | -                   | -                   | -                   | -                                 | -                    | -                   | -                   | -                   |
| <b>Ex-smoker</b>          | 0.89<br>(0.73-1.10) | 0.94<br>(0.99-1.54)               | 0.83<br>(0.60-1.15) | 0.88<br>(0.63-1.23) | 0.78<br>(0.57-1.05) | 0.89<br>(0.64-1.22)               | 0.59<br>(0.42- 0.84) | 0.79<br>(0.51-1.03) | 1.15<br>(0.66-1.99) | 1.33<br>(0.75-2.34) |
| <b>Current</b>            | 0.93<br>(0.68-1.29) | 0.97<br>(1.13-1.79)               | 0.64<br>(0.37-1.15) | 0.59<br>(0.32-1.05) | 0.80<br>(0.49-1.30) | 0.81<br>(0.49-1.32)               | 0.70<br>(0.40-1.22)  | 0.78<br>(0.48-1.30) | 0.98<br>(0.39-2.43) | 0.89<br>(0.36-2.20) |
| <b>Social deprivation</b> |                     |                                   |                     |                     |                     |                                   |                      |                     |                     |                     |
| <b>IMD 1-3</b>            | -                   | -                                 | -                   | -                   | -                   | -                                 | -                    | -                   | -                   | -                   |
| <b>IMD 4-5</b>            | 1.11<br>(0.94-1.31) | 1.06<br>(0.89-1.26)               | 0.94<br>(0.72-1.24) | 0.91<br>(0.69-1.1)  | 0.89<br>(0.69-1.16) | 0.79<br>(0.61-1.02)               | 1.40<br>(1.08-1.82)  | 1.26<br>(0.98-1.62) | 0.72<br>(0.44-1.16) | 0.65<br>(0.40-1.05) |

**Bold indicates statistical significance in adjusted model. CS, Corticosteroids; IM, Immunomodulator; HR, Hazard Ratio; CI, confidence interval; IMD, index of multiple deprivations**

**IMD categories 4 and 5 [most deprived] vs IMD categories 1, 2 and 3 [least deprived]**

**Era 1: 2003 – 2005, Era 2 2006 – 2008, Era 3 2009 – 2011 and Era 4 2012 – 2016**

**First CS use: Time to first CS prescription following diagnosis**

**CS dependency: Corticosteroid dependency defined as a repeat steroid prescription within 3 months of the end of a previous steroid prescription or patients with steroid prescriptions for greater than 3 consecutive months**

**Hospitalisation: IBD-related hospital admission following diagnosis**

**Time to diagnosis: Time from first primary care consultation for gastrointestinal symptom(s)**

## Appendix 4: Association of consultation intensity with gastrointestinal symptoms before diagnosis with clinical outcomes following (a) Crohn's disease diagnosis (b) Ulcerative colitis

### (a) Crohn's disease

| Year before diagnosis | CS use                 |                      | CS dependency          |                      | IM use                 |                      | IBD Hospitalisation    |                                   | Intestinal surgery     |                                   | Perianal surgery       |                      |
|-----------------------|------------------------|----------------------|------------------------|----------------------|------------------------|----------------------|------------------------|-----------------------------------|------------------------|-----------------------------------|------------------------|----------------------|
|                       | Unadjusted HR (95% CI) | Adjusted HR (95% CI) | Unadjusted HR (95% CI) | Adjusted HR (95% CI) | Unadjusted HR (95% CI) | Adjusted HR (95% CI) | Unadjusted HR (95% CI) | Adjusted HR (95% CI)              | Unadjusted HR (95% CI) | Adjusted HR (95% CI)              | Unadjusted HR (95% CI) | Adjusted HR (95% CI) |
| <b>Year 1</b>         | 1.08<br>(1.02-1.14)    | 1.03<br>(0.98-1.08)  | 1.06<br>(0.98-1.15)    | 1.01<br>(0.96-1.07)  | 0.99<br>(0.94-1.04)    | 1.00<br>(0.95-1.06)  | 1.19<br>(1.12-1.26)    | <b>1.19</b><br><b>(1.12-1.28)</b> | 1.11<br>(1.03-1.20)    | <b>1.13</b><br><b>(1.03-1.23)</b> | 1.01<br>(0.95-1.07)    | 1.05<br>(0.98-1.13)  |
| <b>Year 2</b>         | 0.99<br>(0.89-1.09)    | 1.00<br>(0.92-1.09)  | 1.00<br>(0.86-1.17)    | 0.99<br>(0.90-1.09)  | 1.02<br>(0.94-1.12)    | 1.03<br>(0.94-1.12)  | 1.12<br>(1.00-1.24)    | <b>1.13</b><br><b>(1.01-1.25)</b> | 0.90<br>(0.74-1.08)    | 0.86<br>(0.71-1.03)               | 1.01<br>(0.92-1.12)    | 1.00<br>(0.90-1.12)  |
| <b>Year 3</b>         | 0.93<br>(0.81-1.07)    | 0.96<br>(0.95-1.08)  | 1.03<br>(0.87-1.23)    | 0.99<br>(0.88-1.11)  | 0.92<br>(0.82-1.04)    | 0.90<br>(0.80-1.02)  | 1.09<br>(0.90-1.31)    | 1.10<br>(0.91-1.33)               | 1.18<br>(0.99-1.42)    | 1.25<br>(0.99-1.48)               | 1.02<br>(0.91-1.48)    | 0.98<br>(0.87-1.11)  |

### (b) Ulcerative colitis

| Year before diagnosis | CS use                 |                                   | CS dependency          |                      | IM use                 |                      | IBD Hospitalisation    |                                   | Colectomy              |                      |
|-----------------------|------------------------|-----------------------------------|------------------------|----------------------|------------------------|----------------------|------------------------|-----------------------------------|------------------------|----------------------|
|                       | Unadjusted HR (95% CI) | Adjusted HR (95% CI)              | Unadjusted HR (95% CI) | Adjusted HR (95% CI) | Unadjusted HR (95% CI) | Adjusted HR (95% CI) | Unadjusted HR (95% CI) | Adjusted HR (95% CI)              | Unadjusted HR (95% CI) | Adjusted HR (95% CI) |
| <b>Year 1</b>         | 1.16<br>(1.10-1.21)    | <b>1.08</b><br><b>(1.04-1.13)</b> | 1.22<br>(1.13-1.31)    | 1.05<br>(1.00-1.11)  | 1.01<br>(0.97-1.06)    | 1.03<br>(0.98-1.08)  | 1.14<br>(1.05-1.24)    | <b>1.12</b><br><b>(1.03-1.21)</b> | 1.14<br>(1.00-1.28)    | 1.12<br>(0.99-1.26)  |
| <b>Year 2</b>         | 1.09<br>(0.99-1.19)    | 1.03<br>(0.96-1.11)               | 1.23<br>(1.09-1.39)    | 1.07<br>(0.98-1.15)  | 1.03<br>(0.94-1.12)    | 1.03<br>(0.95-1.13)  | 1.08<br>(0.94-1.24)    | 1.05<br>(0.92-1.20)               | 0.92<br>(0.68-1.23)    | 0.91<br>(0.68-1.20)  |
| <b>Year 3</b>         | 0.98<br>(0.87-1.12)    | 1.02<br>(0.93-1.12)               | 1.03<br>(0.85-1.24)    | 1.05<br>(0.96-1.16)  | 1.00<br>(0.91-1.11)    | 1.03<br>(0.93-1.13)  | 0.96<br>(0.78-1.18)    | 1.00<br>(0.81-1.23)               | 1.00<br>(0.73-1.37)    | 1.00<br>(0.73-1.28)  |

**Bold indicates statistical significance in adjusted model. CS, Corticosteroids; IM, Immunomodulator; HR, Hazard Ratio; CI, confidence interval; IMD, index of multiple deprivations**

**IMD categories 4 and 5 [most deprived] vs IMD categories 1, 2 and 3 [least deprived]**

**Era 1: 2003 – 2005, Era 2 2006 – 2008, Era 3 2009 – 2011 and Era 4 2012 – 2016**

**First CS use: Time to first CS prescription following diagnosis**

**CS dependency: Corticosteroid dependency defined as a repeat steroid prescription within 3 months of the end of a previous steroid prescription or patients with steroid prescriptions for greater than 3 consecutive months**

**Hospitalisation: IBD-related hospital admission following diagnosis**

**Consultation intensity consultation frequency per person, as a continuous variable, in each individual year over the 3-year period before diagnosis**

## Appendix 5 Factors associated with time to diagnosis, consultation frequency, consultation intensity and hospitalisation before diagnosis of IBD

|                                     | Time to diagnosis      |                           | Consultation frequency |                           | Consultation Intensity          |                               | Prior GI hospitalisation  |                           |
|-------------------------------------|------------------------|---------------------------|------------------------|---------------------------|---------------------------------|-------------------------------|---------------------------|---------------------------|
|                                     | Unadjusted HR (95% CI) | Adjusted HR (95% CI)      | Unadjusted OR (95% CI) | Adjusted OR (95% CI)      | Unadjusted Coefficient (95% CI) | Adjusted Coefficient (95% CI) | Unadjusted OR (95% CI)    | Adjusted OR (95% CI)      |
| <b>Age</b>                          |                        |                           |                        |                           |                                 |                               |                           |                           |
| > 40                                | -                      | -                         | -                      | -                         | -                               | -                             | -                         | -                         |
| < 17                                | 1.05 (0.90 - 1.06)     | 0.99 (0.82 - 1.17)        | 1.71 (1.44 - 2.03)     | <b>2.32 (1.40 - 2.01)</b> | 0.01 (-0.14 - 0.14)             | <b>0.44 (0.20 - 0.67)</b>     | <b>1.62 (1.15 - 2.27)</b> | <b>1.74 (1.21 - 2.48)</b> |
| 17-39                               | 0.98 (0.89 - 1.25)     | 0.99 (0.91 - 1.07)        | 1.75 (1.23 - 2.47)     | <b>1.68 (1.60 - 3.38)</b> | 0.07 (0.01 - 0.14)              | <b>0.37 (0.25 - 0.48)</b>     | 0.96 (0.81 - 1.13)        | 0.95 (0.80 - 1.14)        |
| <b>Sex</b>                          |                        |                           |                        |                           |                                 |                               |                           |                           |
| Male                                | -                      | -                         | -                      | -                         | -                               | -                             | -                         | -                         |
| Female                              | 0.85 (0.78 - 0.91)     | <b>0.89 (0.82 - 0.96)</b> | 1.23 (1.04 - 1.45)     | 1.12 (0.94 - 1.33)        | 0.05 (-0.06 - 0.15)             | 0.00 (-0.11 - 1.11)           | 0.95 (0.81 - 1.11)        | 0.96 (0.81 - 1.13)        |
| <b>Social Deprivation</b>           |                        |                           |                        |                           |                                 |                               |                           |                           |
| IMD 1-3                             | -                      | -                         | -                      | -                         | -                               | -                             | -                         | -                         |
| IMD 4-5                             | 0.99 (0.91 - 1.08)     | 1.01 (0.93 - 1.10)        | 1.18 (0.99 - 1.41)     | 1.09 (0.91 - 1.30)        | 0.14 (0.03 - 0.26)              | 0.10 (-0.02 - 0.22)           | 1.33 (1.12 - 1.58)        | <b>1.29 (1.09 - 1.54)</b> |
| <b>Smoking status*</b>              |                        |                           |                        |                           |                                 |                               |                           |                           |
| Never                               | -                      | -                         | -                      | -                         | -                               | -                             | -                         | -                         |
| Ex-smoker                           | 0.95 (0.87 - 1.04)     | 0.91 (0.82 - 1.01)        | 0.89 (0.71 - 1.11)     | 1.06 (0.84 - 1.34)        | -0.90 (-0.22 - 0.04)            | 0.03 (-0.10 - 0.25)           | 1.16 (0.93 - 1.43)        | 1.16 (0.93 - 1.46)        |
| Current                             | 0.92 (0.81 - 1.03)     | 0.93 (0.88 - 1.08)        | 1.48 (1.12 - 1.95)     | <b>1.42 (1.07 - 1.88)</b> | 0.34 (0.17 - 0.51)              | <b>0.34 (0.16 - 0.51)</b>     | 1.26 (0.96 - 1.65)        | 1.23 (0.94 - 1.63)        |
| <b>Premorbid Depression-anxiety</b> | 0.84 (0.76 - 0.93)     | <b>0.87 (0.78 - 0.96)</b> | 1.26 (1.01 - 1.56)     | <b>1.28 (1.02 - 1.60)</b> | 0.09 (-0.06 - 0.23)             | 0.12 (-0.22 - 0.27)           | 1.19 (0.96 - 1.46)        | 1.17 (0.91 - 1.52)        |
| <b>Premorbid IBS</b>                | 0.64 (0.56 - 0.72)     | <b>0.66 (0.58 - 0.75)</b> | 2.05(1.60 - 2.62)      | <b>1.87 (1.44 - 2.41)</b> | 0.16 (-0.01 - 0.34)             | 0.08 (-0.10 - 0.25)           | 1.12 (0.87 - 1.44)        | 1.18 (0.95 - 1.46)        |
| <b>Era of diagnosis</b>             |                        |                           |                        |                           |                                 |                               |                           |                           |
| Era 1                               | -                      | -                         | -                      | -                         | -                               | -                             | -                         | -                         |
| Era 2                               | 1.06 (0.95 - 1.18)     | 1.06 (0.95 - 1.18)        | 1.08 (0.86 - 1.36)     | 1.04 (0.82 - 1.32)        | -0.06 (-0.21 - 0.08)            | -0.74 (-0.22 - 0.07)          | 1.34 (1.07 - 1.68)        | <b>1.31 (1.04 - 1.64)</b> |
| Era 3                               | 1.03 (0.92 - 1.15)     | 1.01 (0.91 - 1.13)        | 1.13 (0.89 - 1.42)     | 1.05 (0.83 - 1.32)        | -0.10 (-0.25 - 0.06)            | -1.13 (-0.28 - 0.27)          | 1.62 (1.29 - 2.05)        | <b>1.57 (1.23 - 1.99)</b> |
| Era 4                               | 1.02 (0.92 - 1.14)     | 1.00 (0.89 - 1.12)        | 0.94 (0.74 - 1.20)     | 0.88 (0.68 - 1.12)        | -0.18 (-0.34 - -0.03)           | -0.22 (-0.37 - 0.06)          | 1.69 (1.34 - 2.12)        | <b>1.61 (1.26 - 2.03)</b> |



**Bold indicates statistical significance in adjusted model Note: Multiple regression includes all variables and covariates of simple regression. Abbreviations: CS, Corticosteroids; IM, Immunomodulator; HR, Hazard Ratio; CI, confidence interval; IMD, index of multiple deprivations**

**IMD categories 4 and 5 [most deprived] vs IMD categories 1, 2 and 3 [least deprived]**

**Era 1: 2003 – 2005, Era 2 2006 – 2008, Era 3 2009- 2011 and Era 4 2012 – 2016**

**First CS use: Time to first CS prescription following diagnosis**

**CS dependency: Corticosteroid dependency defined as a repeat steroid prescription within 3 months of the end of a previous steroid prescription or patients with steroid prescriptions for greater than 3 consecutive months**

**Hospitalisation: First IBD-related hospital admission following diagnosis**

**Time to diagnosis: Time from first primary care consultation for gastrointestinal symptom(s)**

**Consultation intensity: consultation frequency per person in the year prior to IBD diagnosis**

**Abbreviation gastrointestinal (GI)**
